# Supplementary material for: Design and characterization of a semi-open dynamic chamber for measuring biogenic volatile organic compounds (BVOCs) emissions from plants
Source: Copernicus journal article supplement (doi:10.5194/amt-2021-265), 2021-09-07
Supplement: Supplementary file 1 [file amt-2021-265-supplement.pdf]

1 *Supplement of*  
2 **Design and characterization of a semi-open dynamic chamber for measuring biogenic volatile**  
3 **organic compounds (BVOCs) emissions from plants**  
4 Jianqiang Zeng et al.  
5 *Correspondence to:* Yanli Zhang (zhang\_yl86@gig.ac.cn) or Xinming Wang (wangxm@gig.ac.cn)  
6

7 **Figure captions**

8 Figure S1. Testing ozone removal efficiencies of the four ozone scrubbers.

9 Figure S2. Testing losses of BVOCs in the ozone scrubbers.

10 Figure S3. Theoretically predicted steady state concentrations (solid line) changing with circulating  
11 air flow rates for a BVOC species in the enclosure, assuming 5.0 g dry mass of enclosed leaves and  
12 an extremely low emission rate of  $0.01 \mu\text{g g}^{-1} \text{h}^{-1}$ . The colored bar area is the ranges of MDLs for  
13 sesquiterpenes listed in Table S1.

14 Figure S4. Changes of BVOCs loss ratios (mean  $\pm 1\sigma$ , n=5) with flow rates.

15 Figure S5. Measured BVOC species when conducting tests with branches of *Pinus massoniana*  
16 (upper) and *Mangifera indica* (lower).

17 Figure S6. Comparison of environmental parameters (temperature, RH and PAR) inside and outside  
18 the enclosure during testing emission of BVOCs from branches of a pine tree (*Pinus massoniana*)  
19 in the Guangdong Tree Garden (23.20 °N, 113.38 °E) of the Guangdong Academy of Forestry in  
20 Guangzhou, south China.

21

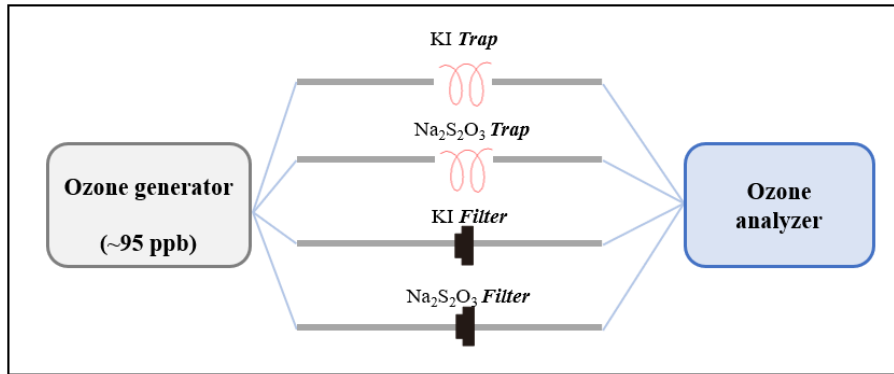

22

23

24

Figure S1. Testing ozone removal efficiencies of the four ozone scrubbers.

25

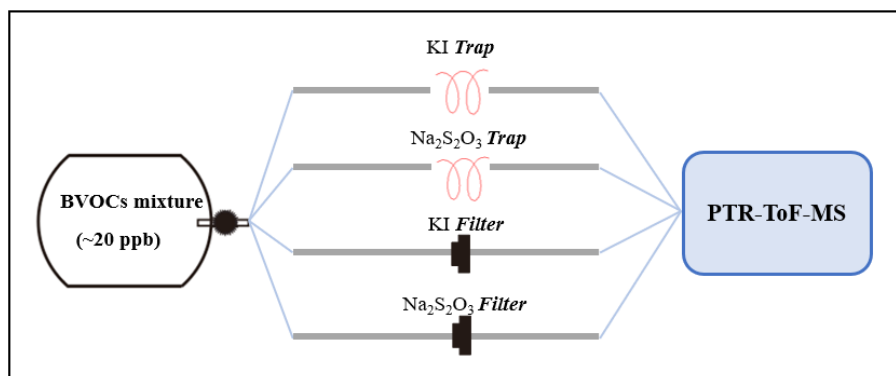

26

27

Figure S2. Testing losses of BVOCs in the ozone scrubbers.

28

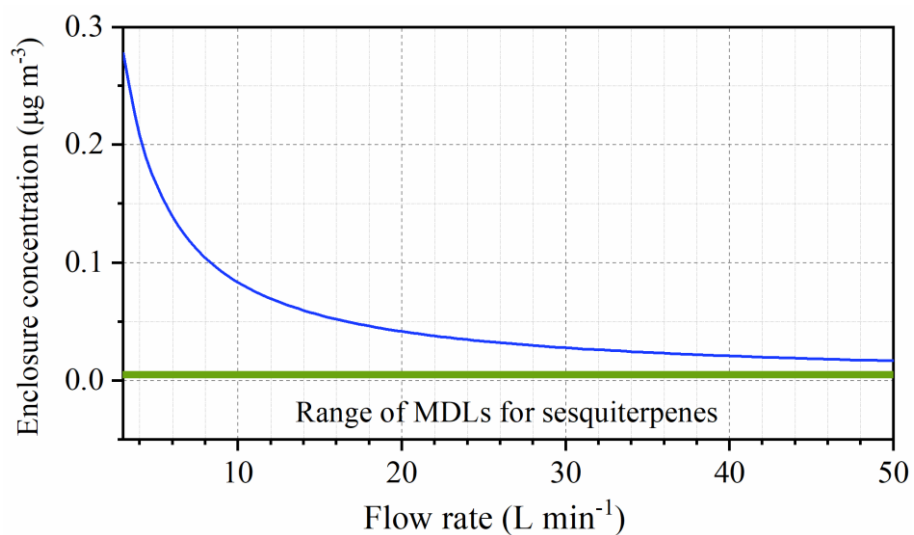

29

30 Figure S3. Theoretically predicted steady state concentrations (solid line) changing with circulating  
 31 air flow rates for a BVOC species in the enclosure, assuming 5.0 g dry mass of enclosed leaves and  
 32 an extremely low emission rate of  $0.01 \mu\text{g g}^{-1} \text{h}^{-1}$ . The colored bar area is the ranges of MDLs for  
 33 sesquiterpenes listed in [Table S1](#).

34

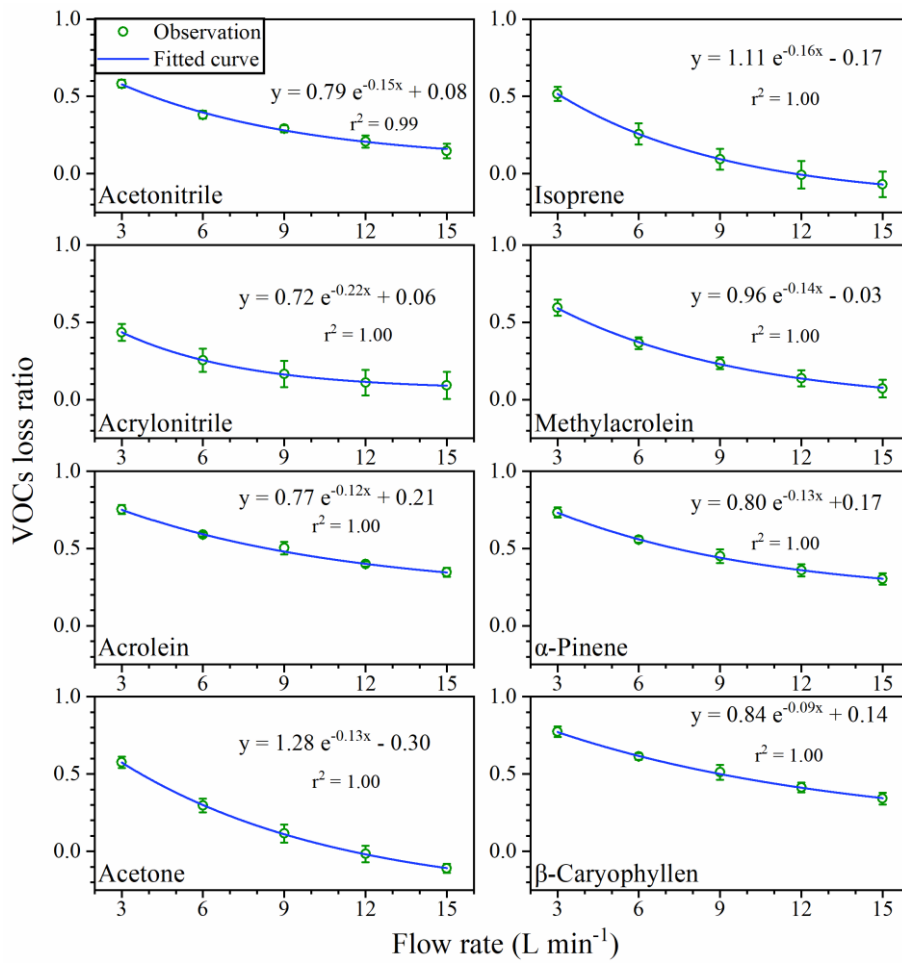

35

36

Figure S4. Changes of BVOCs loss ratios (mean  $\pm 1\sigma$ , n=5) with flow rates.

37

38

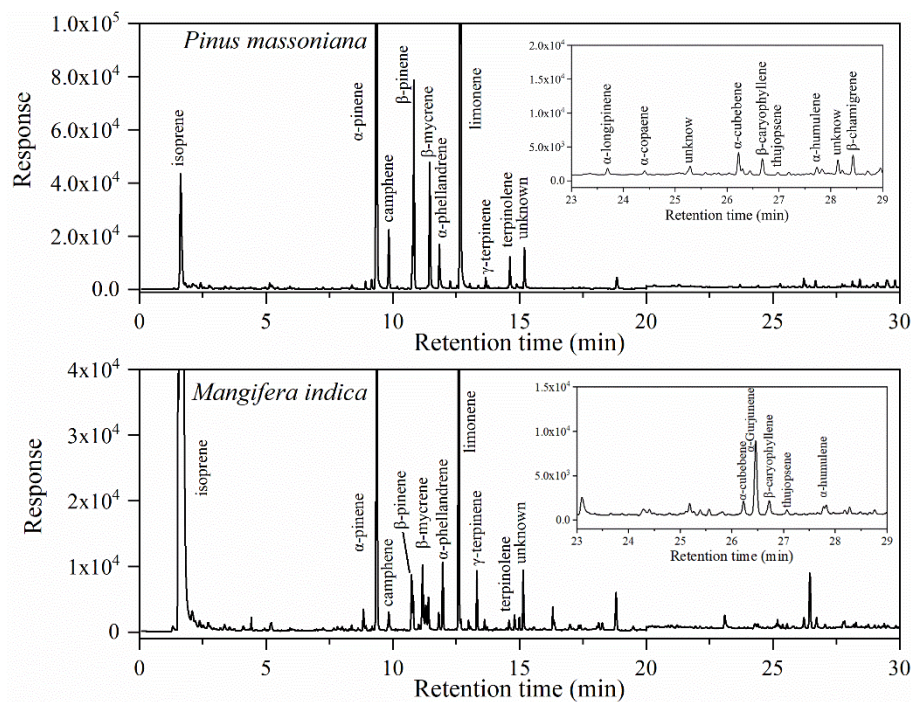

39

40 Figure S5. Measured BVOC species when conducting tests with branches of *pinus massoniana*

41 (upper) and *mangifera indica* (lower).

42

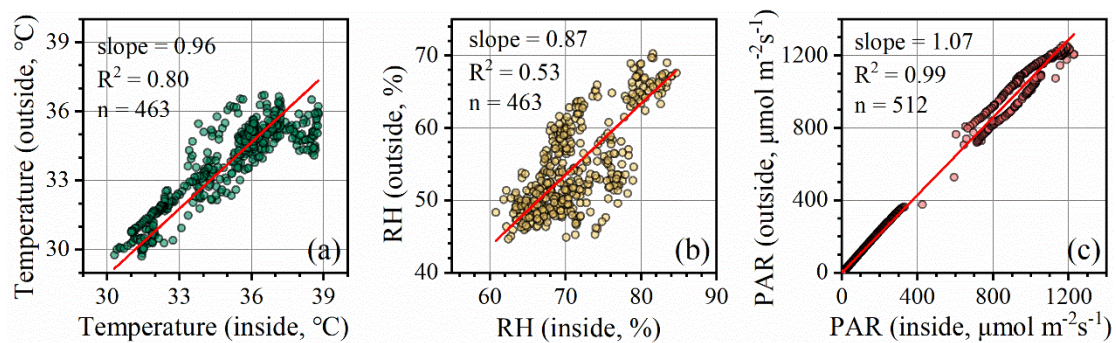

43

44 Figure S6. Comparison of environmental parameters (temperature, RH and PAR) inside and outside  
 45 the enclosure during testing emission of BVOCs from branches of a pine tree (*pinus massoniana*)  
 46 in the Guangdong Tree Garden (23.20 °N, 113.38 °E) of the Guangdong Academy of Forestry in  
 47 Guangzhou, south China.

48



49 **Table captions**

50 Table S1. Method detection limits (MDLs) and measurement precisions.

51 Table S2. BVOCs in the standard mixtures.

52 Table S3. Correction factors ( $k$ ) of BVOCs under different flow rates and humidity.

53 Table S1. Method detection limits (MDLs) and measurement precisions.

| Instruments          | Compounds              | MDL (ng m <sup>-3</sup> ) | Precise (%) |
|----------------------|------------------------|---------------------------|-------------|
| TD-GC/MS             | Isoprene               | 56                        | 1%          |
|                      | $\alpha$ -Pinene       | 10                        | 4%          |
|                      | $\beta$ -Pinene        | 8                         | 4%          |
|                      | $\beta$ -Mycrene       | 16                        | 6%          |
|                      | $\alpha$ -Phellandrene | 5                         | 3%          |
|                      | 3-Carene               | 6                         | 3%          |
|                      | Limonene               | 11                        | 6%          |
|                      | 1,8-Cineole            | 17                        | 5%          |
|                      | $\gamma$ -Terpinene    | 8                         | 6%          |
|                      | Terpinolene            | 15                        | 9%          |
|                      | Linalool               | 10                        | 6%          |
|                      | trans-Pinocarveol      | 10                        | 6%          |
|                      | $\alpha$ -Longipinene  | 1                         | 3%          |
|                      | Longicyclene           | 6                         | 9%          |
|                      | $\alpha$ -Copaene      | 2                         | 9%          |
|                      | $\alpha$ -Gurjunene    | 4                         | 14%         |
|                      | $\beta$ -Caryophyllene | 5                         | 13%         |
|                      | Thujopsene             | 6                         | 15%         |
|                      | Aromadendrene          | 5                         | 12%         |
|                      | $\alpha$ -Humulene     | 4                         | 12%         |
| Alloaromadendrene    | 8                      | 12%                       |             |
| $\beta$ -Chamigrene  | 6                      | 14%                       |             |
| $\alpha$ -Bisabololo | 6                      | 6%                        |             |
| PTR-ToF-MS           | Isoprene               | 176                       | 10%         |
|                      | Monoterpenes           | 389                       | 10%         |

54

55

56 Table S2. BVOCs in the standard mixtures.

| Compounds              | CAS Number | Formula                         | Molar mass | Purity (%) | Supplier      |
|------------------------|------------|---------------------------------|------------|------------|---------------|
| Isoprene               | 78-79-5    | C <sub>5</sub> H <sub>8</sub>   | 68.12      | 99         | Sigma-Aldrich |
| $\alpha$ -pinene       | 7785-26-4  | C <sub>10</sub> H <sub>16</sub> | 136.23     | 97         | Sigma-Aldrich |
| $\beta$ -Caryophyllene | 87-44-5    | C <sub>15</sub> H <sub>24</sub> | 204.35     | 98.5       | Sigma-Aldrich |
| Acetonitrile           | 70-05-8    | C <sub>2</sub> H <sub>3</sub> N | 41.05      | 99.5       | CHEMSERVICE   |
| Acrylonitrile          | 107-13-1   | C <sub>3</sub> H <sub>3</sub> N | 53.06      | 99         | CHEMSERVICE   |
| Acrolein               | 107-02-8   | C <sub>3</sub> H <sub>4</sub> O | 56.06      | 99         | CHEMSERVICE   |
| Acetone                | 67-64-1    | C <sub>3</sub> H <sub>6</sub> O | 58.08      | 99.5       | CHEMSERVICE   |
| Methylacrolein         | 78-85-3    | C <sub>4</sub> H <sub>6</sub> O | 70.09      | 95         | CHEMSERVICE   |

57

58

59 Table S3. Correction factors ( $k$ ) of BVOCs under different flow rates and humidity.

| Species                | Flow rate<br>(L min <sup>-1</sup> ) | 0% RH | 20% RH | 40% RH | 60% RH | 80% RH | 100% RH |
|------------------------|-------------------------------------|-------|--------|--------|--------|--------|---------|
| Acetonitrile           | 3                                   | 3.58  | 4.53   | 4.34   | 3.73   | 4.34   | 4.63    |
|                        | 6                                   | 3.67  | 2.95   | 4.00   | 3.95   | 3.75   | 3.94    |
|                        | 9                                   | 3.84  | 2.96   | 3.71   | 3.66   | 3.99   | 4.01    |
|                        | 12                                  | 3.59  | 2.01   | 2.72   | 2.98   | 3.99   | 3.65    |
|                        | 15                                  | 2.91  | 0.97   | 2.28   | 2.87   | 2.98   | 3.63    |
| Acrylonitrile          | 3                                   | 2.96  | 3.06   | 2.15   | 1.71   | 2.17   | 2.09    |
|                        | 6                                   | 3.40  | 2.76   | 1.39   | 1.19   | 1.95   | 2.04    |
|                        | 9                                   | 3.15  | 3.21   | 0.76   | 0.62   | 1.78   | 1.75    |
|                        | 12                                  | 2.76  | 3.08   | 0.06   | 0.26   | 1.80   | 1.55    |
|                        | 15                                  | 3.21  | 3.42   | -0.20  | -0.09  | 2.25   | 1.33    |
| Acrolein               | 3                                   | 7.19  | 10.85  | 10.88  | 8.21   | 9.30   | 9.35    |
|                        | 6                                   | 8.07  | 8.75   | 9.52   | 8.45   | 8.51   | 8.61    |
|                        | 9                                   | 11.64 | 9.15   | 10.21  | 8.56   | 7.55   | 8.00    |
|                        | 12                                  | 8.85  | 7.72   | 8.41   | 7.46   | 7.84   | 7.49    |
|                        | 15                                  | 9.39  | 7.86   | 8.47   | 6.87   | 6.84   | 8.35    |
| Acetone                | 3                                   | 3.94  | 4.77   | 4.60   | 3.21   | 3.76   | 4.35    |
|                        | 6                                   | 3.31  | 2.77   | 2.48   | 2.00   | 1.88   | 2.84    |
|                        | 9                                   | 2.29  | 1.75   | 0.81   | 0.68   | 0.49   | 1.24    |
|                        | 12                                  | 0.86  | 0.04   | -1.02  | -0.18  | -0.55  | -0.13   |
|                        | 15                                  | -0.92 | -1.44  | -1.79  | -1.32  | -1.41  | -1.91   |
| Isoprene               | 3                                   | 2.88  | 3.29   | 3.01   | 2.46   | 3.63   | 4.20    |
|                        | 6                                   | 2.61  | 1.97   | 1.24   | 1.41   | 2.32   | 3.25    |
|                        | 9                                   | 1.13  | 1.25   | 0.25   | 0.00   | 1.27   | 1.98    |
|                        | 12                                  | -0.49 | 0.21   | -1.68  | 0.02   | 0.74   | 1.10    |
|                        | 15                                  | -2.13 | -0.99  | -2.03  | -0.90  | -0.10  | 0.75    |
| Methylacrolein         | 3                                   | 3.07  | 4.50   | 4.50   | 4.04   | 5.15   | 5.65    |
|                        | 6                                   | 3.09  | 2.93   | 3.09   | 3.48   | 3.82   | 4.48    |
|                        | 9                                   | 2.47  | 2.22   | 2.61   | 2.38   | 3.26   | 3.81    |
|                        | 12                                  | 1.65  | 0.70   | 1.69   | 1.99   | 2.90   | 2.82    |
|                        | 15                                  | 0.97  | 0.19   | 0.09   | 1.32   | 2.46   | 2.31    |
| $\alpha$ -Pinene       | 3                                   | 7.26  | 10.29  | 10.29  | 7.11   | 8.10   | 7.55    |
|                        | 6                                   | 8.15  | 7.73   | 8.40   | 7.15   | 7.05   | 6.93    |
|                        | 9                                   | 9.43  | 8.27   | 7.95   | 6.84   | 6.05   | 6.10    |
|                        | 12                                  | 8.42  | 7.19   | 7.36   | 6.71   | 5.48   | 5.48    |
|                        | 15                                  | 8.22  | 6.82   | 7.49   | 6.18   | 5.55   | 5.20    |
| $\beta$ -Caryophyllene | 3                                   | 8.25  | 13.34  | 12.80  | 8.84   | 9.86   | 9.85    |
|                        | 6                                   | 10.20 | 10.22  | 10.65  | 8.76   | 8.73   | 8.88    |
|                        | 9                                   | 12.52 | 10.26  | 10.38  | 8.71   | 7.28   | 8.22    |
|                        | 12                                  | 10.25 | 8.74   | 8.88   | 8.44   | 7.53   | 7.12    |
|                        | 15                                  | 10.49 | 7.79   | 8.15   | 6.73   | 6.75   | 7.17    |
